# Supplementary material
Source: PubMed Central journal article supplement (PMC5860800)
Supplement: NIHMS950370-supplement-Appendix.pdf [file NIHMS950370-supplement-Appendix.pdf]

**Appendix**  
**Treatment Costs of Breast Cancer Among Younger Women Aged 19–44 Years Enrolled in Medicaid**  
**Ekwueme et al.**

**Appendix Table 1.** Covariate Balance for the Non-Hispanic White Sample

| Category                                          | Variable                        | Breast cancer sample Mean | Comparison sample Mean | <i>p</i> -value |
|---------------------------------------------------|---------------------------------|---------------------------|------------------------|-----------------|
|                                                   | Observations                    | 2,509                     | 2,509                  |                 |
| Monthly costs by service type in 2010 U.S.\$ (SD) |                                 | <b>\$3,414</b>            | <b>\$1,258</b>         |                 |
|                                                   | Monthly total costs             | (\$5,625)                 | (\$2,751)              | <0.01           |
|                                                   |                                 | <b>\$1,385</b>            | <b>\$180</b>           |                 |
|                                                   | Monthly outpatient costs        | (\$2,722)                 | (\$554)                | <0.01           |
|                                                   |                                 | <b>\$568</b>              | <b>\$263</b>           |                 |
|                                                   | Monthly inpatient costs         | (\$3,352)                 | (\$1,576)              | <0.01           |
|                                                   |                                 | <b>\$601</b>              | <b>\$279</b>           |                 |
|                                                   | Monthly prescription drug costs | (\$1,439)                 | (\$525)                | <0.01           |
|                                                   |                                 | 0.832                     | 0.839                  |                 |
| Medicaid enrollment                               | Proportion of the year enrolled | (0.257)                   | (0.254)                | 0.27            |
| Age (years)                                       | 19 to 23                        | 1.1%                      | 1.2%                   |                 |
|                                                   | 24 to 28                        | 3.4%                      | 3.5%                   |                 |
|                                                   | 29 to 33                        | 7.9%                      | 7.7%                   |                 |
|                                                   | 34 to 38                        | 22.0%                     | 22.1%                  |                 |
|                                                   | 39 to 44                        | 65.6%                     | 65.5%                  | 0.998           |
| Charlson Index                                    | Charlson score of zero          | 82.9%                     | 81.1%                  |                 |
|                                                   | Charlson score of one           | 13.0%                     | 14.3%                  |                 |
|                                                   | Charlson score greater than one | 4.1%                      | 4.6%                   | 0.37            |
| Comorbidities                                     | Cancer diagnosis                | 3.6%                      | 4.2%                   | 0.33            |
|                                                   | Hypertension                    | 8.5%                      | 9.3%                   | 0.43            |
|                                                   | Dyslipidemia                    | 5.5%                      | 5.2%                   | 0.73            |
|                                                   | Pneumonia                       | 3.3%                      | 3.6%                   | 0.71            |
|                                                   | Asthma                          | 6.4%                      | 6.4%                   | 0.92            |
|                                                   | Depression                      | 13.2%                     | 15.6%                  | 0.04            |
|                                                   | Back problems                   | 13.3%                     | 14.3%                  | 0.39            |
|                                                   | Skin disorders                  | 10.1%                     | 10.2%                  | 0.95            |
|                                                   | Injuries                        | 19.2%                     | 20.0%                  | 0.51            |
|                                                   | Pregnancy                       | 3.5%                      | 3.7%                   | 0.81            |
|                                                   | Arthritis                       | 8.6%                      | 9.1%                   | 0.64            |
|                                                   | Mental health/substance abuse   | 21.7%                     | 24.0%                  | 0.09            |
|                                                   | Mental retardation              | 1.2%                      | 0.9%                   | 0.52            |

*Note:* State dummies were included in the match. Boldface indicates statistical significance, The *p*=0.01 level indicates statistically significant differences between the breast cancer sample and the matched comparison sample was 0.995. Cancer diagnosis includes one of the following cancers: ovarian cancer, colorectal cancer, lung cancer, cervical cancer, skin cancer, leukemia and lymphoma.

**Appendix**  
**Treatment Costs of Breast Cancer Among Younger Women Aged 19–44 Years Enrolled in Medicaid**  
**Ekwueme et al.**

**Appendix Table 2.** Covariate Balance for the Non-Hispanic Black Sample

| Category                                          | Variable                        | Breast cancer<br>sample<br>Mean | Comparison<br>sample<br>Mean | <i>p</i> -value |
|---------------------------------------------------|---------------------------------|---------------------------------|------------------------------|-----------------|
|                                                   | Observations                    | 1,426                           | 1,426                        |                 |
| Monthly costs by service type in 2012 U.S.\$ (SD) |                                 | <b>\$4,040</b>                  | <b>\$1,708</b>               |                 |
|                                                   | Monthly total costs             | (\$6,972)                       | (\$4,928)                    | <0.01           |
|                                                   |                                 | <b>\$1,424</b>                  | <b>\$210</b>                 |                 |
|                                                   | Monthly outpatient costs        | (\$2,746)                       | (\$562)                      | <0.01           |
|                                                   |                                 | <b>\$1,078</b>                  | <b>\$677</b>                 |                 |
|                                                   | Monthly inpatient costs         | (\$5,465)                       | (\$3,994)                    | 0.03            |
|                                                   |                                 | <b>\$530</b>                    | <b>\$237</b>                 |                 |
|                                                   | Monthly prescription drug costs | (\$1,160)                       | (\$585)                      | <0.01           |
| Medicaid enrollment Age (years)                   | Proportion of the year enrolled | 0.816                           | 0.831                        |                 |
|                                                   | 19 to 23                        | (0.273)                         | (0.266)                      | 0.11            |
|                                                   | 24 to 28                        | 0.4%                            | 0.4%                         |                 |
|                                                   | 29 to 33                        | 4.0%                            | 3.6%                         |                 |
|                                                   | 34 to 38                        | 9.7%                            | 9.0%                         |                 |
|                                                   | 39 to 44                        | 23.1%                           | 24.5%                        |                 |
| Charlson Index                                    | Charlson score of zero          | 62.9%                           | 62.5%                        | 0.89            |
|                                                   | Charlson score of one           | 78.4%                           | 75.3%                        |                 |
|                                                   | Charlson score greater than one | 13.6%                           | 14.5%                        |                 |
| Comorbidities                                     | Cancer diagnosis                | 8.0%                            | 10.2%                        | 0.17            |
|                                                   | Hypertension                    | 4.1%                            | 4.2%                         | 0.89            |
|                                                   | Dyslipidemia                    | 22.0%                           | 24.2%                        | 0.22            |
|                                                   | Pneumonia                       | 3.9%                            | 4.5%                         | 0.51            |
|                                                   | Asthma                          | 4.7%                            | 5.2%                         | 0.56            |
|                                                   | Depression                      | 6.3%                            | 7.2%                         | 0.43            |
|                                                   | Back problems                   | 8.3%                            | 8.4%                         | 0.91            |
|                                                   | Skin disorders                  | 9.0%                            | 8.1%                         | 0.47            |
|                                                   | Injuries                        | 9.1%                            | 9.8%                         | 0.62            |
|                                                   | Pregnancy                       | 17.7%                           | 19.1%                        | 0.42            |
|                                                   | Arthritis                       | 4.4%                            | 4.9%                         | 0.54            |
|                                                   | Mental health/substance abuse   | 7.9%                            | 7.5%                         | 0.73            |
|                                                   | Mental retardation              | 16.4%                           | 18.3%                        | 0.26            |
|                                                   |                                 | 1.5%                            | 1.3%                         | 0.77            |

*Note:* State dummies were included in the match. Boldface indicates statistical significance, The \*\**p*=0.01 level; \**p*=0.05 level indicates statistically significant differences between the breast cancer sample and the matched comparison sample was 0.999. Cancer diagnosis includes one of the following cancers: ovarian cancer, colorectal cancer, lung cancer, cervical cancer, skin cancer, leukemia and lymphoma.

**Appendix**  
**Treatment Costs of Breast Cancer Among Younger Women Aged 19–44 Years Enrolled in Medicaid**  
**Ekwueme et al.**

**Appendix Table 3.** Covariate Balance for the Hispanic Sample

| Category                                          | Variable                        | Breast cancer sample Mean | Comparison sample Mean | <i>p</i> -value |
|---------------------------------------------------|---------------------------------|---------------------------|------------------------|-----------------|
|                                                   | Observations                    | 1,043                     | 1,043                  |                 |
| Monthly costs by service type in 2012 U.S.\$ (SD) |                                 | <b>\$3,278</b>            | <b>\$835</b>           |                 |
|                                                   | Monthly total costs             | (\$6,740)                 | (\$2,774)              | <0.01           |
|                                                   |                                 | <b>\$1,344</b>            | <b>\$143</b>           |                 |
|                                                   | Monthly outpatient costs        | (\$2,219)                 | (\$692)                | <0.01           |
|                                                   |                                 | <b>\$779</b>              | <b>\$292</b>           |                 |
|                                                   | Monthly inpatient costs         | (\$3,047)                 | (\$1,801)              | <0.01           |
|                                                   |                                 | <b>\$361</b>              | <b>\$152</b>           |                 |
|                                                   | Monthly prescription drug costs | (\$1,088)                 | (\$483)                | <0.01           |
| Medicaid enrollment Age (years)                   |                                 | 0.833                     | 0.841                  |                 |
|                                                   | Proportion of the year enrolled | (0.254)                   | (0.252)                | 0.39            |
|                                                   | 19 to 23                        | 1.0%                      | 1.0%                   |                 |
|                                                   | 24 to 28                        | 3.3%                      | 3.8%                   |                 |
|                                                   | 29 to 33                        | 10.9%                     | 10.2%                  |                 |
|                                                   | 34 to 38                        | 23.8%                     | 22.7%                  |                 |
| Charlson Index                                    | 39 to 44                        | 61.1%                     | 62.3%                  | 0.93            |
|                                                   | Charlson score of zero          | 86.1%                     | 85.9%                  |                 |
|                                                   | Charlson score of one           | 10.6%                     | 9.8%                   |                 |
| Comorbidities                                     | Charlson score greater than one | 3.3%                      | 4.3%                   | 0.52            |
|                                                   | Cancer diagnosis                | 4.3%                      | 4.9%                   | 0.55            |
|                                                   | Hypertension                    | 5.9%                      | 7.2%                   | 0.31            |
|                                                   | Dyslipidemia                    | 4.3%                      | 4.7%                   | 0.74            |
|                                                   | Pneumonia                       | 2.7%                      | 3.1%                   | 0.64            |
|                                                   | Asthma                          | 2.2%                      | 2.0%                   | 0.76            |
|                                                   | Depression                      | 4.0%                      | 3.9%                   | 0.95            |
|                                                   | Back problems                   | 8.2%                      | 8.7%                   | 0.73            |
|                                                   | Skin disorders                  | 6.8%                      | 6.4%                   | 0.71            |
|                                                   | Injuries                        | 11.7%                     | 12.1%                  | 0.83            |
|                                                   | Pregnancy                       | 4.6%                      | 4.3%                   | 0.76            |
|                                                   | Arthritis                       | 7.4%                      | 8.0%                   | 0.66            |
|                                                   | Mental health/substance abuse   | 7.7%                      | 8.2%                   | 0.70            |
| Mental retardation                                | 0.8%                            | 0.6%                      | 0.57                   |                 |

*Note:* State dummies were included in the match. Boldface indicates statistical significance, The *p*=0.01 level indicates statistically significant differences between the breast cancer sample and the matched comparison sample was 0.998. Cancer diagnosis includes one of the following cancers: ovarian cancer, colorectal cancer, lung cancer, cervical cancer, skin cancer, leukemia and lymphoma.

**Appendix**  
**Treatment Costs of Breast Cancer Among Younger Women Aged 19–44 Years Enrolled in Medicaid**  
**Ekwueme et al.**

**Appendix Table 4.** Covariate Balance for the Non-Hispanic Other Sample

| Category                                          | Variable                        | Breast cancer<br>sample<br>Mean | Comparison<br>sample<br>Mean | <i>p</i> -value  |
|---------------------------------------------------|---------------------------------|---------------------------------|------------------------------|------------------|
|                                                   | Observations                    | 564                             | 564                          |                  |
| Monthly costs by service type in 2012 U.S.\$ (SD) | Monthly total costs             | <b>\$2,936</b><br>(\$4,388)     | <b>\$1,274</b><br>(\$3,919)  | <0.01            |
|                                                   | Monthly outpatient costs        | <b>\$1,409</b><br>(\$2,922)     | <b>\$185</b><br>(\$809)      | <0.01            |
|                                                   | Monthly inpatient costs         | \$446<br>(\$1,555)              | \$380<br>(\$2,732)           | 0.59             |
|                                                   | Monthly prescription drug costs | <b>\$452</b><br>(\$1,056)       | <b>\$244</b><br>(\$546)      | <0.01            |
|                                                   | Medicaid enrollment Age (years) | Proportion of the year enrolled | 0.859<br>(0.249)             | 0.865<br>(0.240) |
|                                                   | 19 to 23                        | 0.5%                            | 0.5%                         |                  |
|                                                   | 24 to 28                        | 2.5%                            | 2.9%                         |                  |
|                                                   | 29 to 33                        | 8.0%                            | 9.4%                         |                  |
|                                                   | 34 to 38                        | 21.7%                           | 21.1%                        |                  |
|                                                   | 39 to 44                        | 67.3%                           | 66.2%                        | 0.91             |
| Charlson Index                                    | Charlson score of zero          | 86.5%                           | 84.4%                        |                  |
|                                                   | Charlson score of one           | 10.4%                           | 12.3%                        |                  |
|                                                   | Charlson score greater than one | 3.1%                            | 3.3%                         | 0.65             |
| Comorbidities                                     | Cancer diagnosis                | 3.6%                            | 4.0%                         | 0.74             |
|                                                   | Hypertension                    | 8.5%                            | 9.4%                         | 0.65             |
|                                                   | Dyslipidemia                    | 3.3%                            | 3.7%                         | 0.76             |
|                                                   | Pneumonia                       | 3.3%                            | 3.5%                         | 0.87             |
|                                                   | Asthma                          | 3.6%                            | 3.1%                         | 0.68             |
|                                                   | Depression                      | 8.6%                            | 8.8%                         | 0.92             |
|                                                   | Back problems                   | 9.9%                            | 8.8%                         | 0.61             |
|                                                   | Skin disorders                  | 5.9%                            | 5.9%                         | 0.97             |
|                                                   | Injuries                        | 13.9%                           | 12.3%                        | 0.49             |
|                                                   | Pregnancy                       | 2.3%                            | 2.8%                         | 0.64             |
|                                                   | Arthritis                       | 7.8%                            | 8.2%                         | 0.84             |
|                                                   | Mental health/substance abuse   | 15.0%                           | 14.3%                        | 0.75             |
|                                                   | Mental retardation              | 0.8%                            | 1.8%                         | 0.21             |

*Note:* State dummies were included in the match. Boldface indicates statistical significance, The  $p=0.01$  level indicates statistically significant differences between the breast cancer sample and the matched comparison sample was 0.998. Cancer diagnosis includes one of the following cancers: ovarian cancer, colorectal cancer, lung cancer, cervical cancer, skin cancer, leukemia and lymphoma.
